# Supplementary material for: A Third Dose of SARS-CoV-2 Vaccine Increases Neutralizing Antibodies Against Variants of Concern in Solid Organ Transplant Recipients
Source: PubMed Central journal article supplement — medRxiv. 2021 Oct 13:2021.08.11.21261914. Preprint. [Version 2] doi: 10.1101/2021.08.11.21261914 (PMC8528082; doi:10.1101/2021.08.11.21261914), 2021-10-13

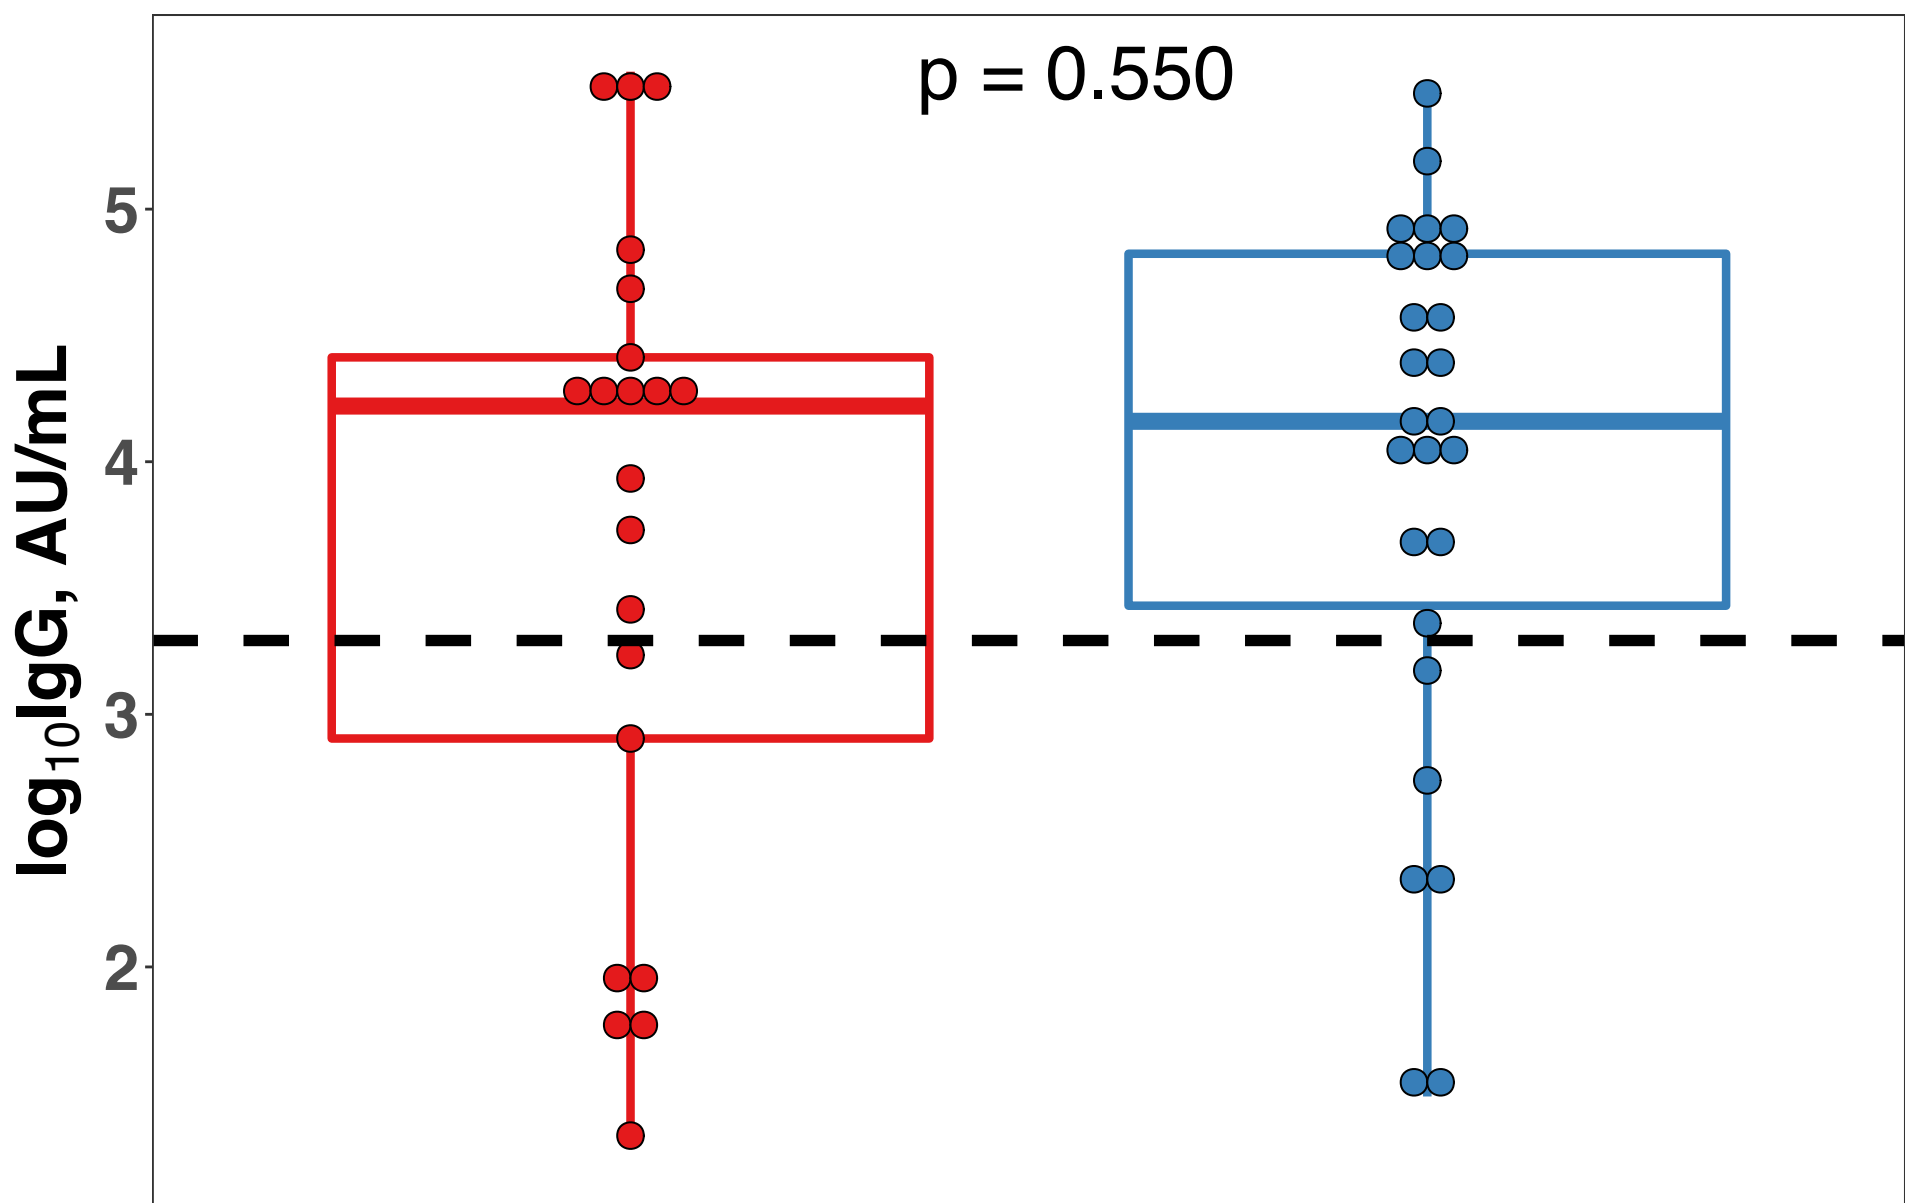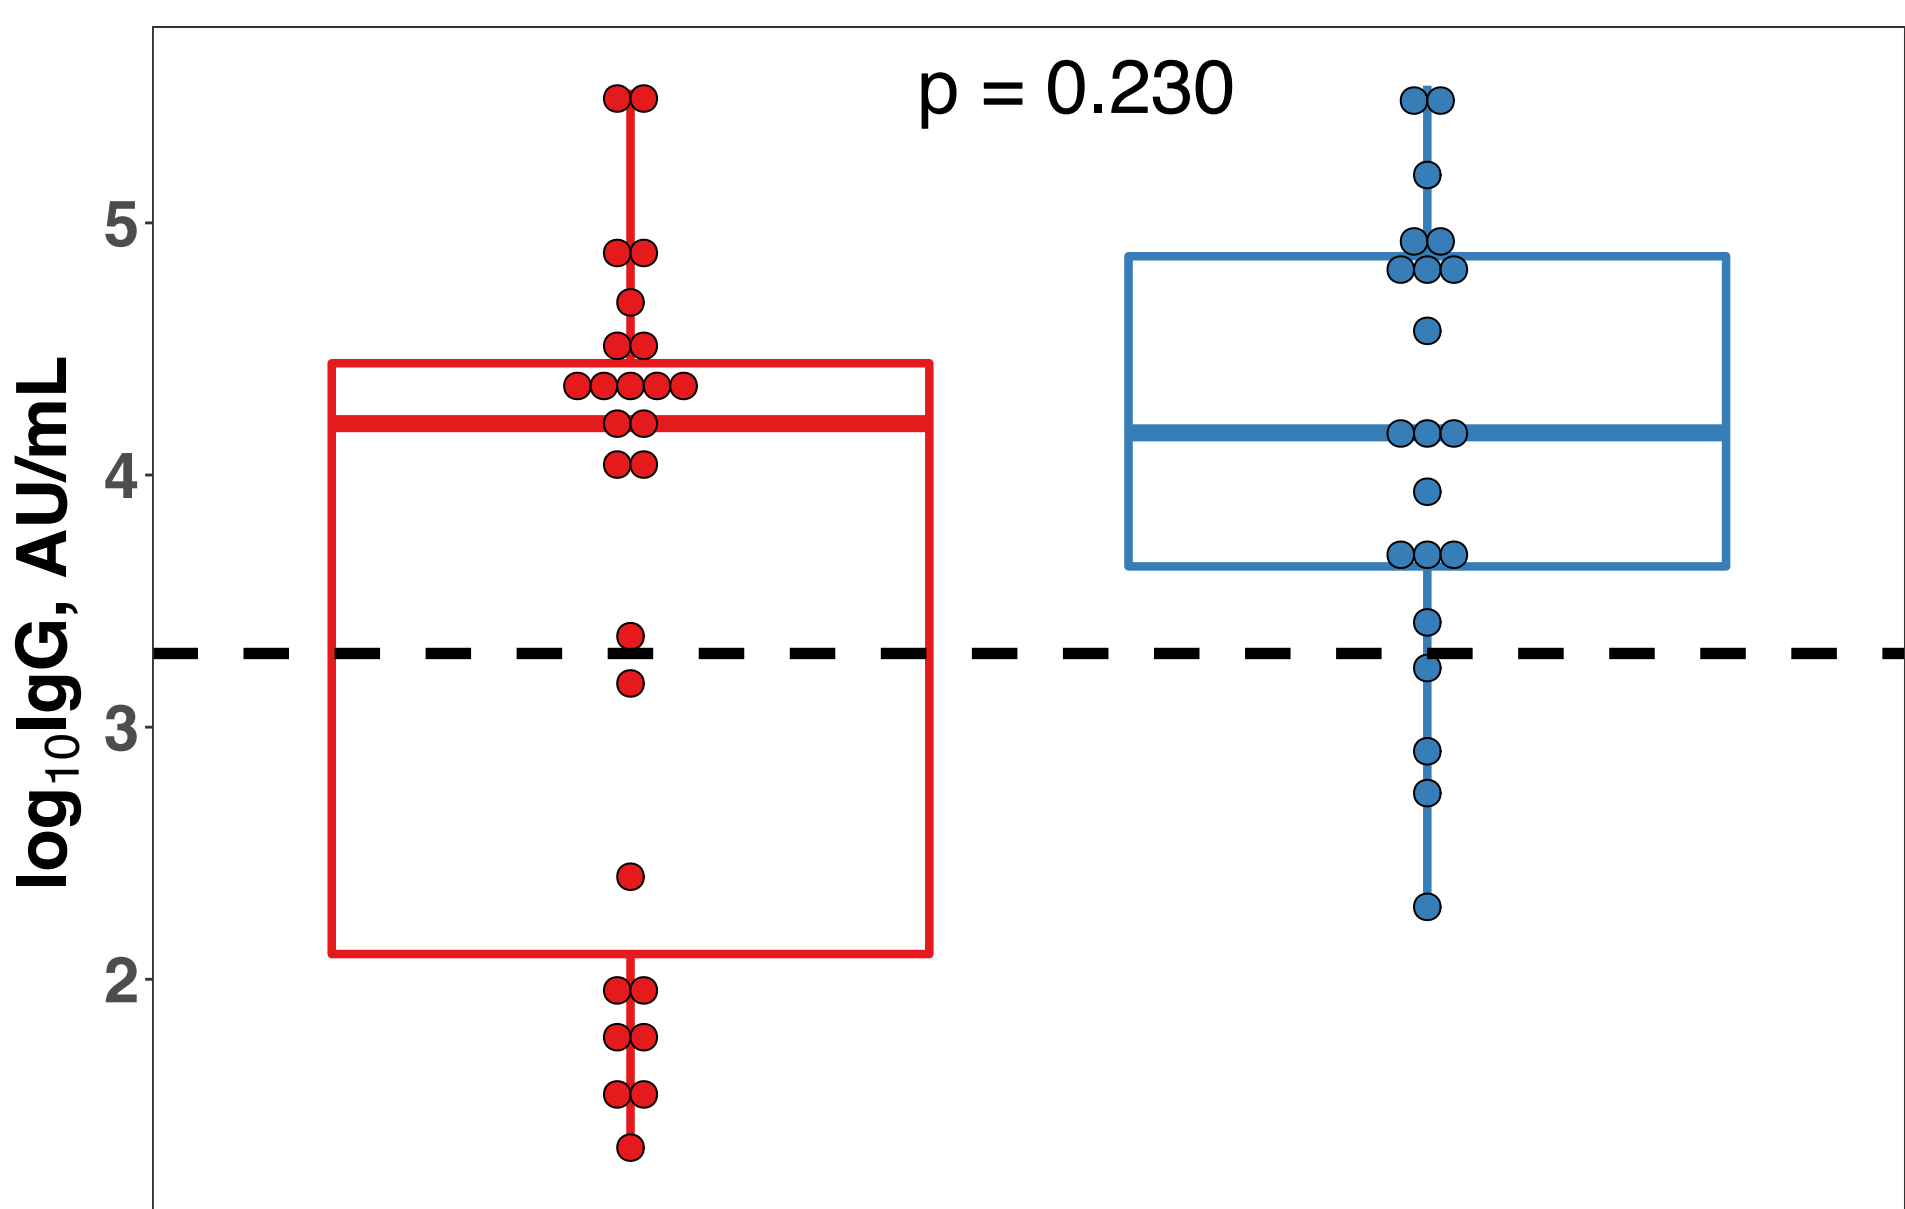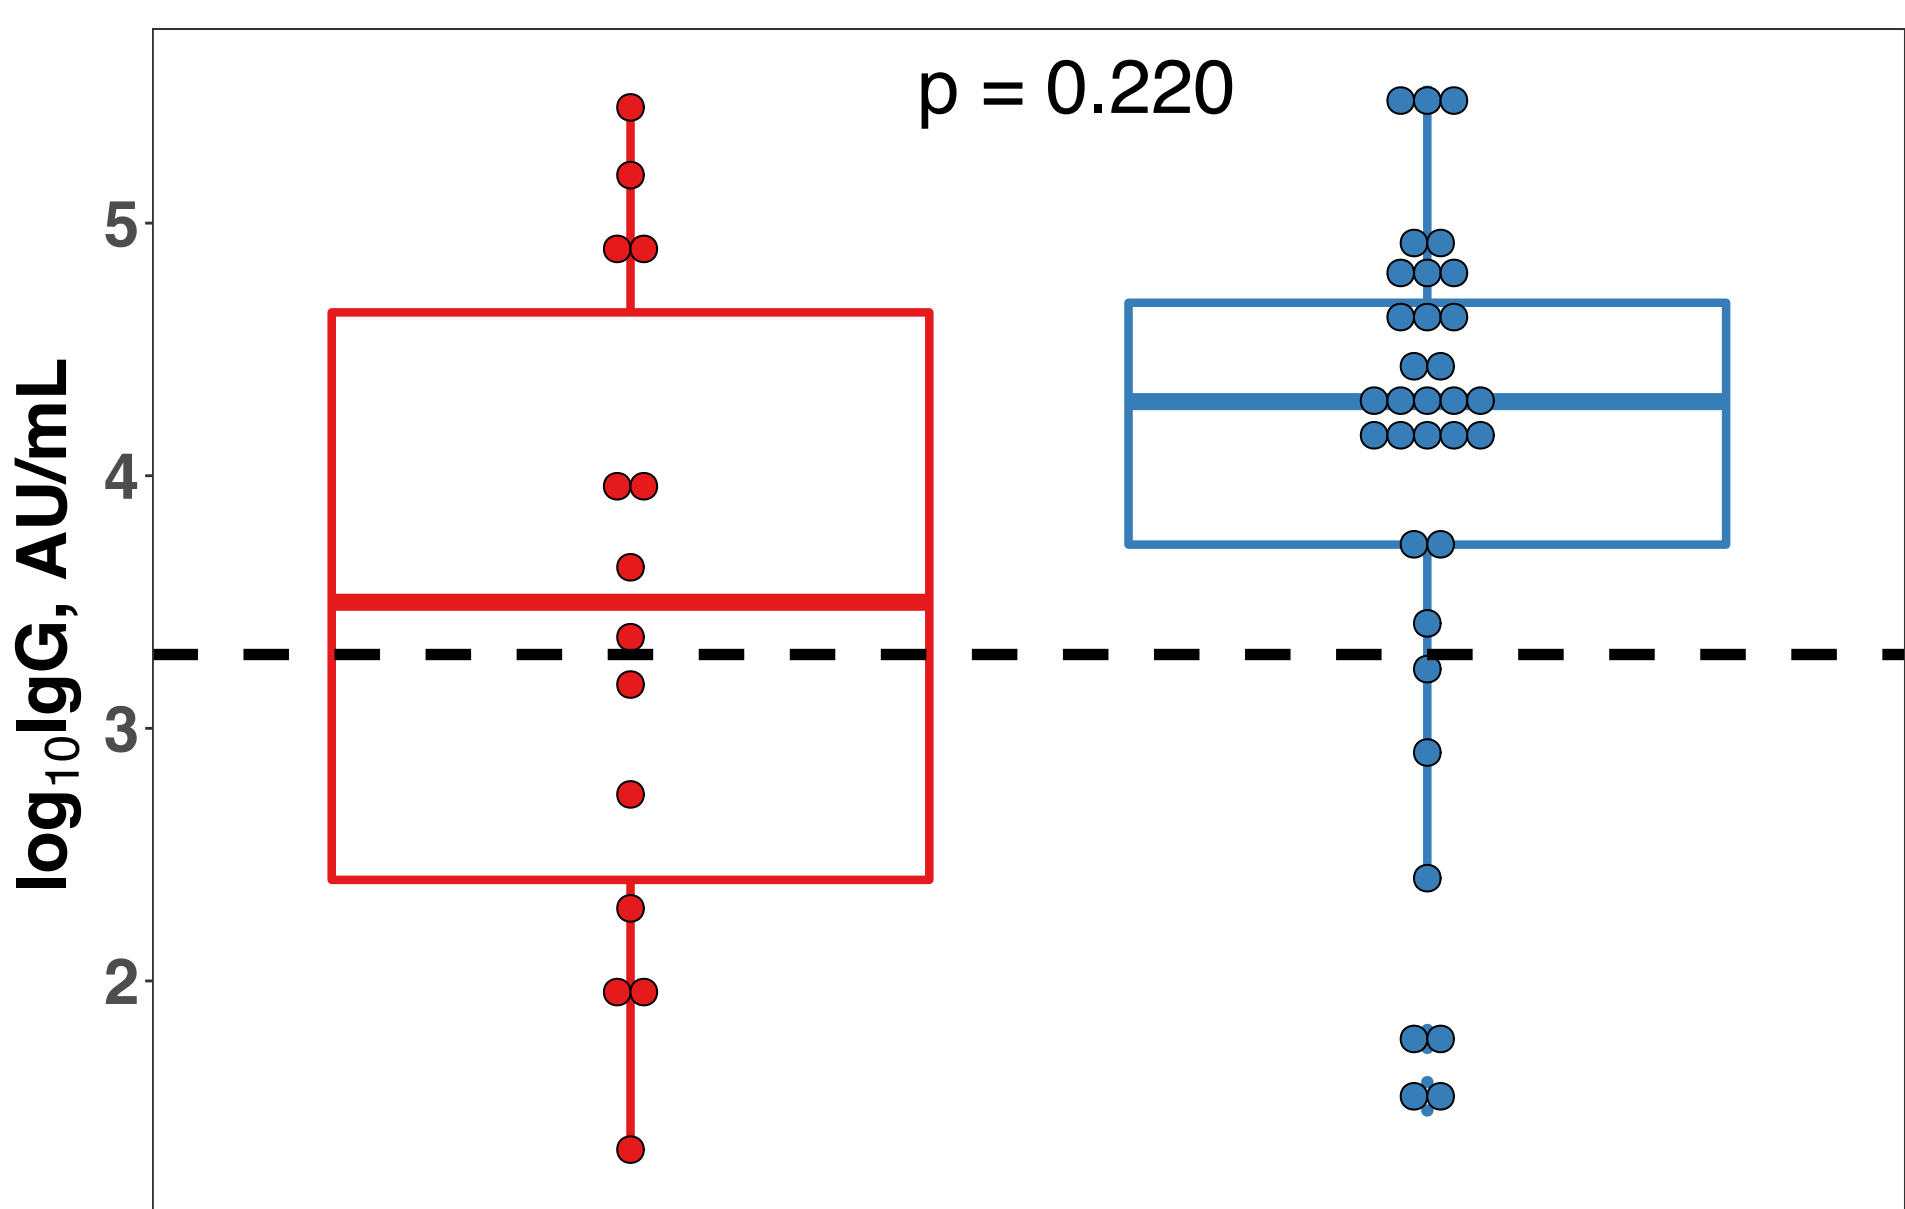

Supplement: media-3.pdf [file media-3.pdf]
