# Supplementary material for: A Third Dose of SARS-CoV-2 Vaccine Increases Neutralizing Antibodies Against Variants of Concern in Solid Organ Transplant Recipients
Source: bioRxiv or medRxiv preprint supplement (doi:10.1101/2021.08.11.21261914), 2021-10-13

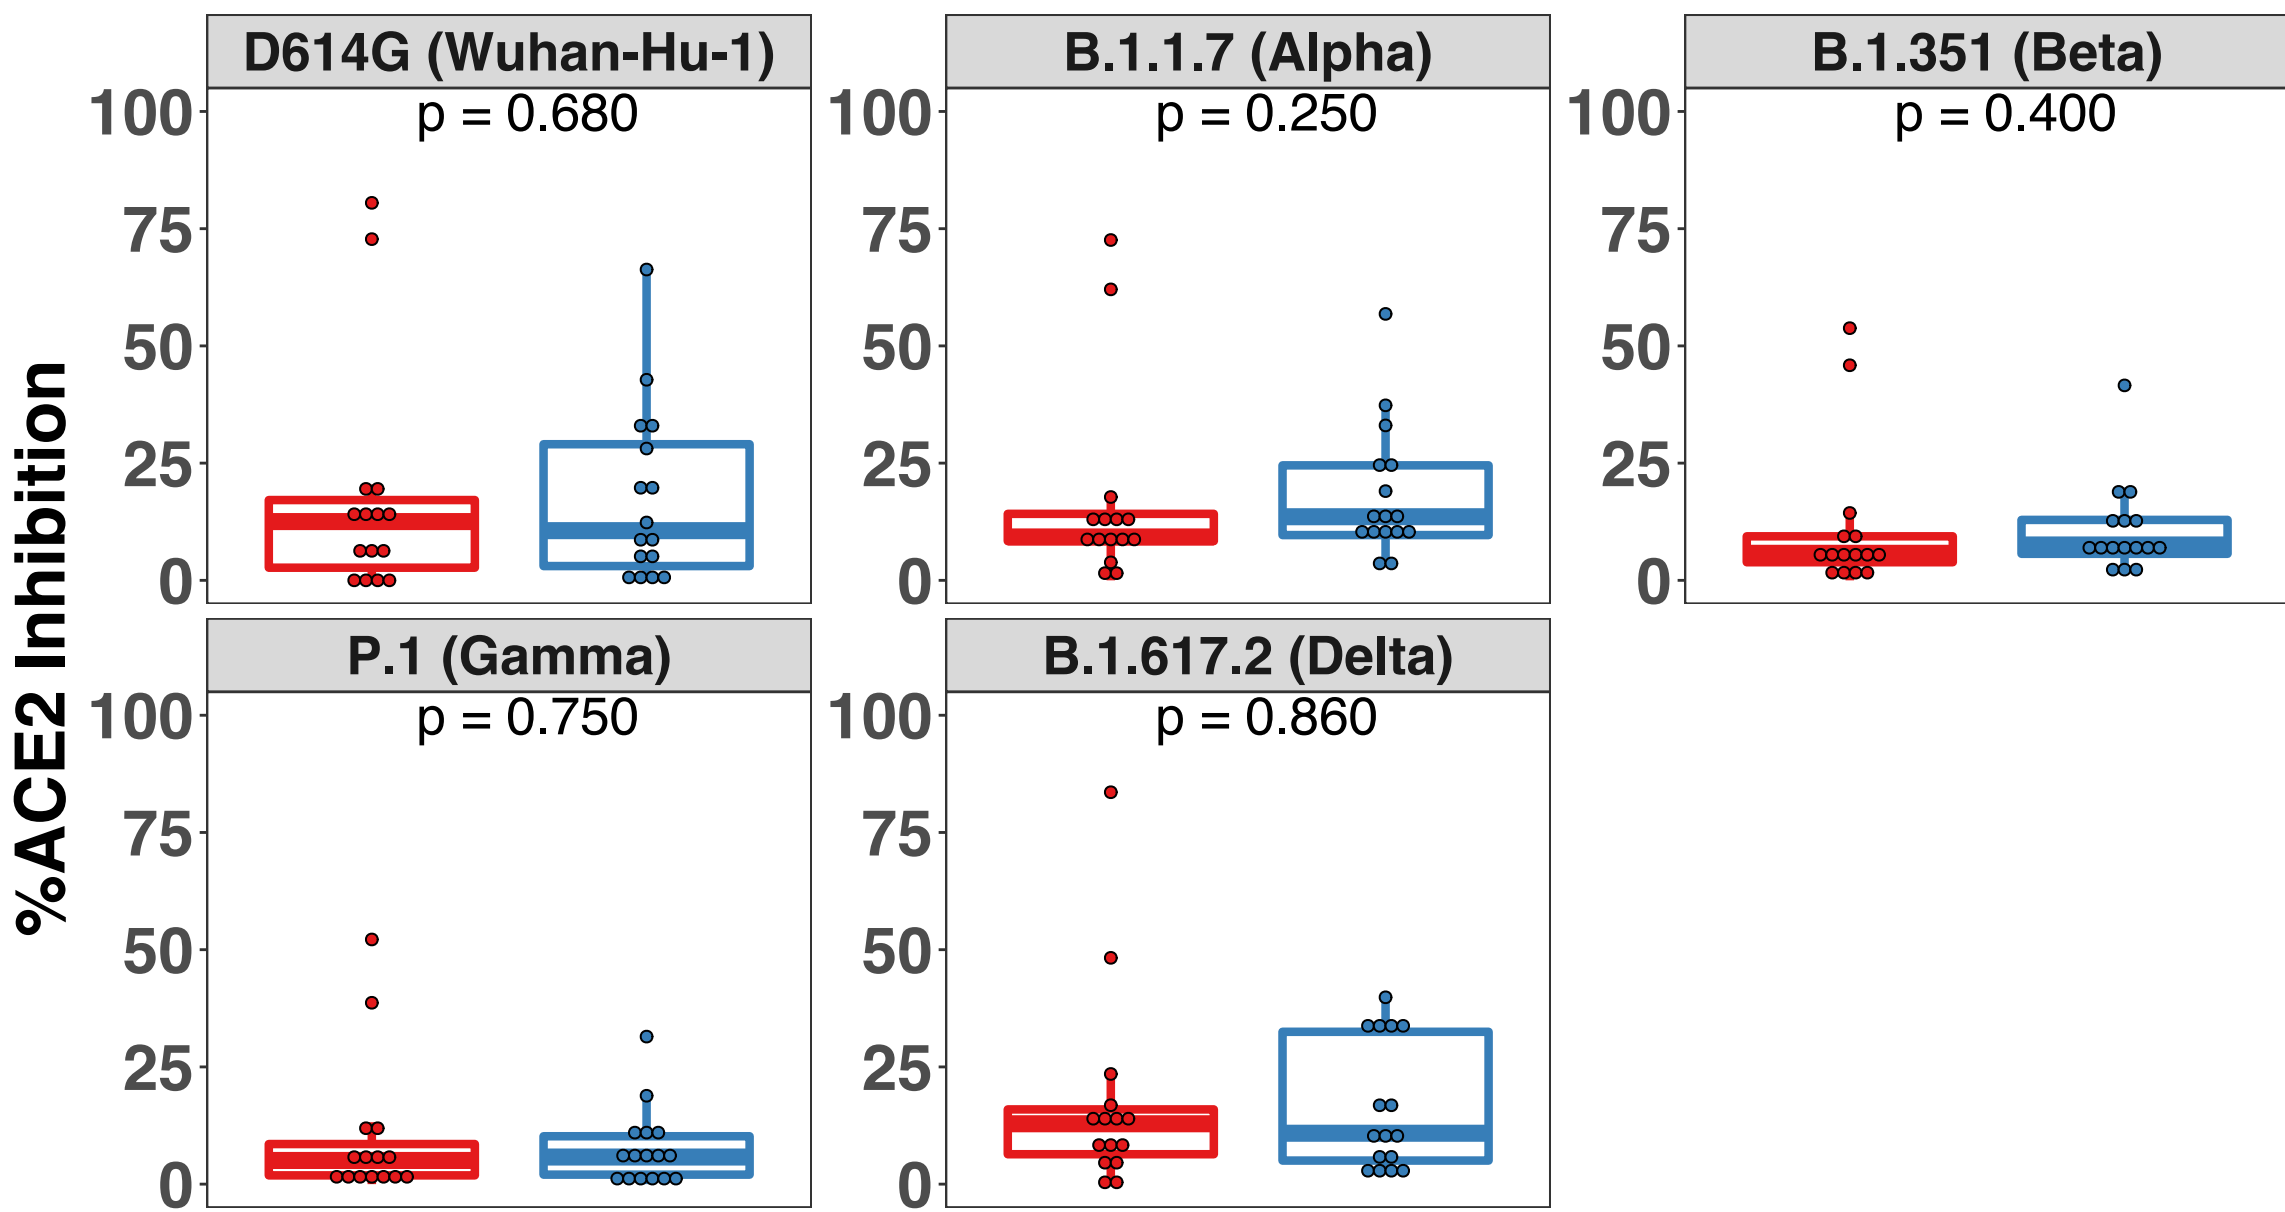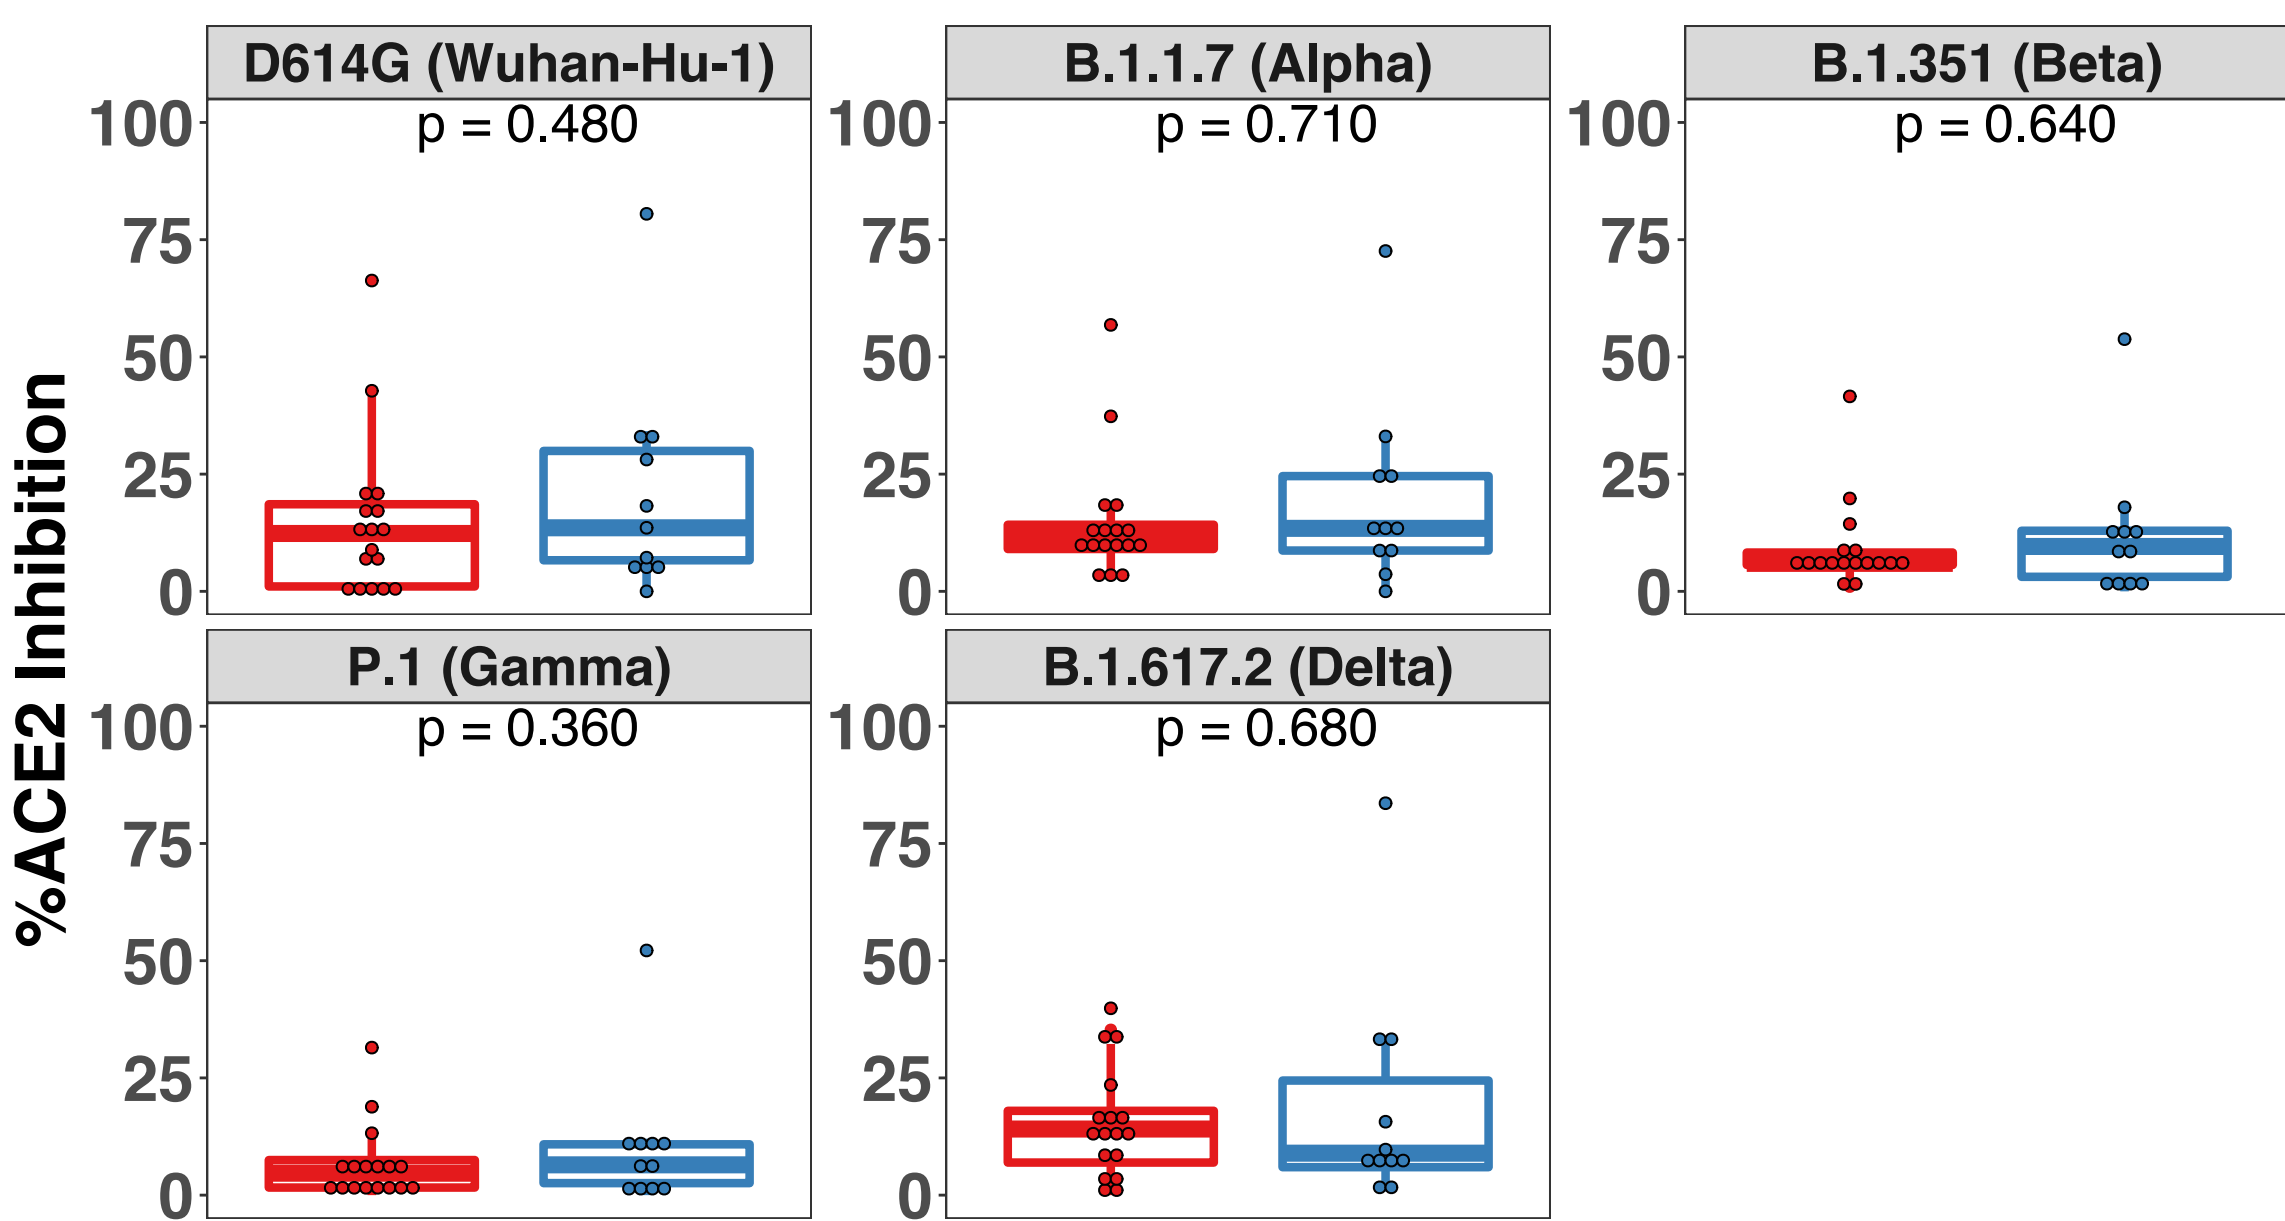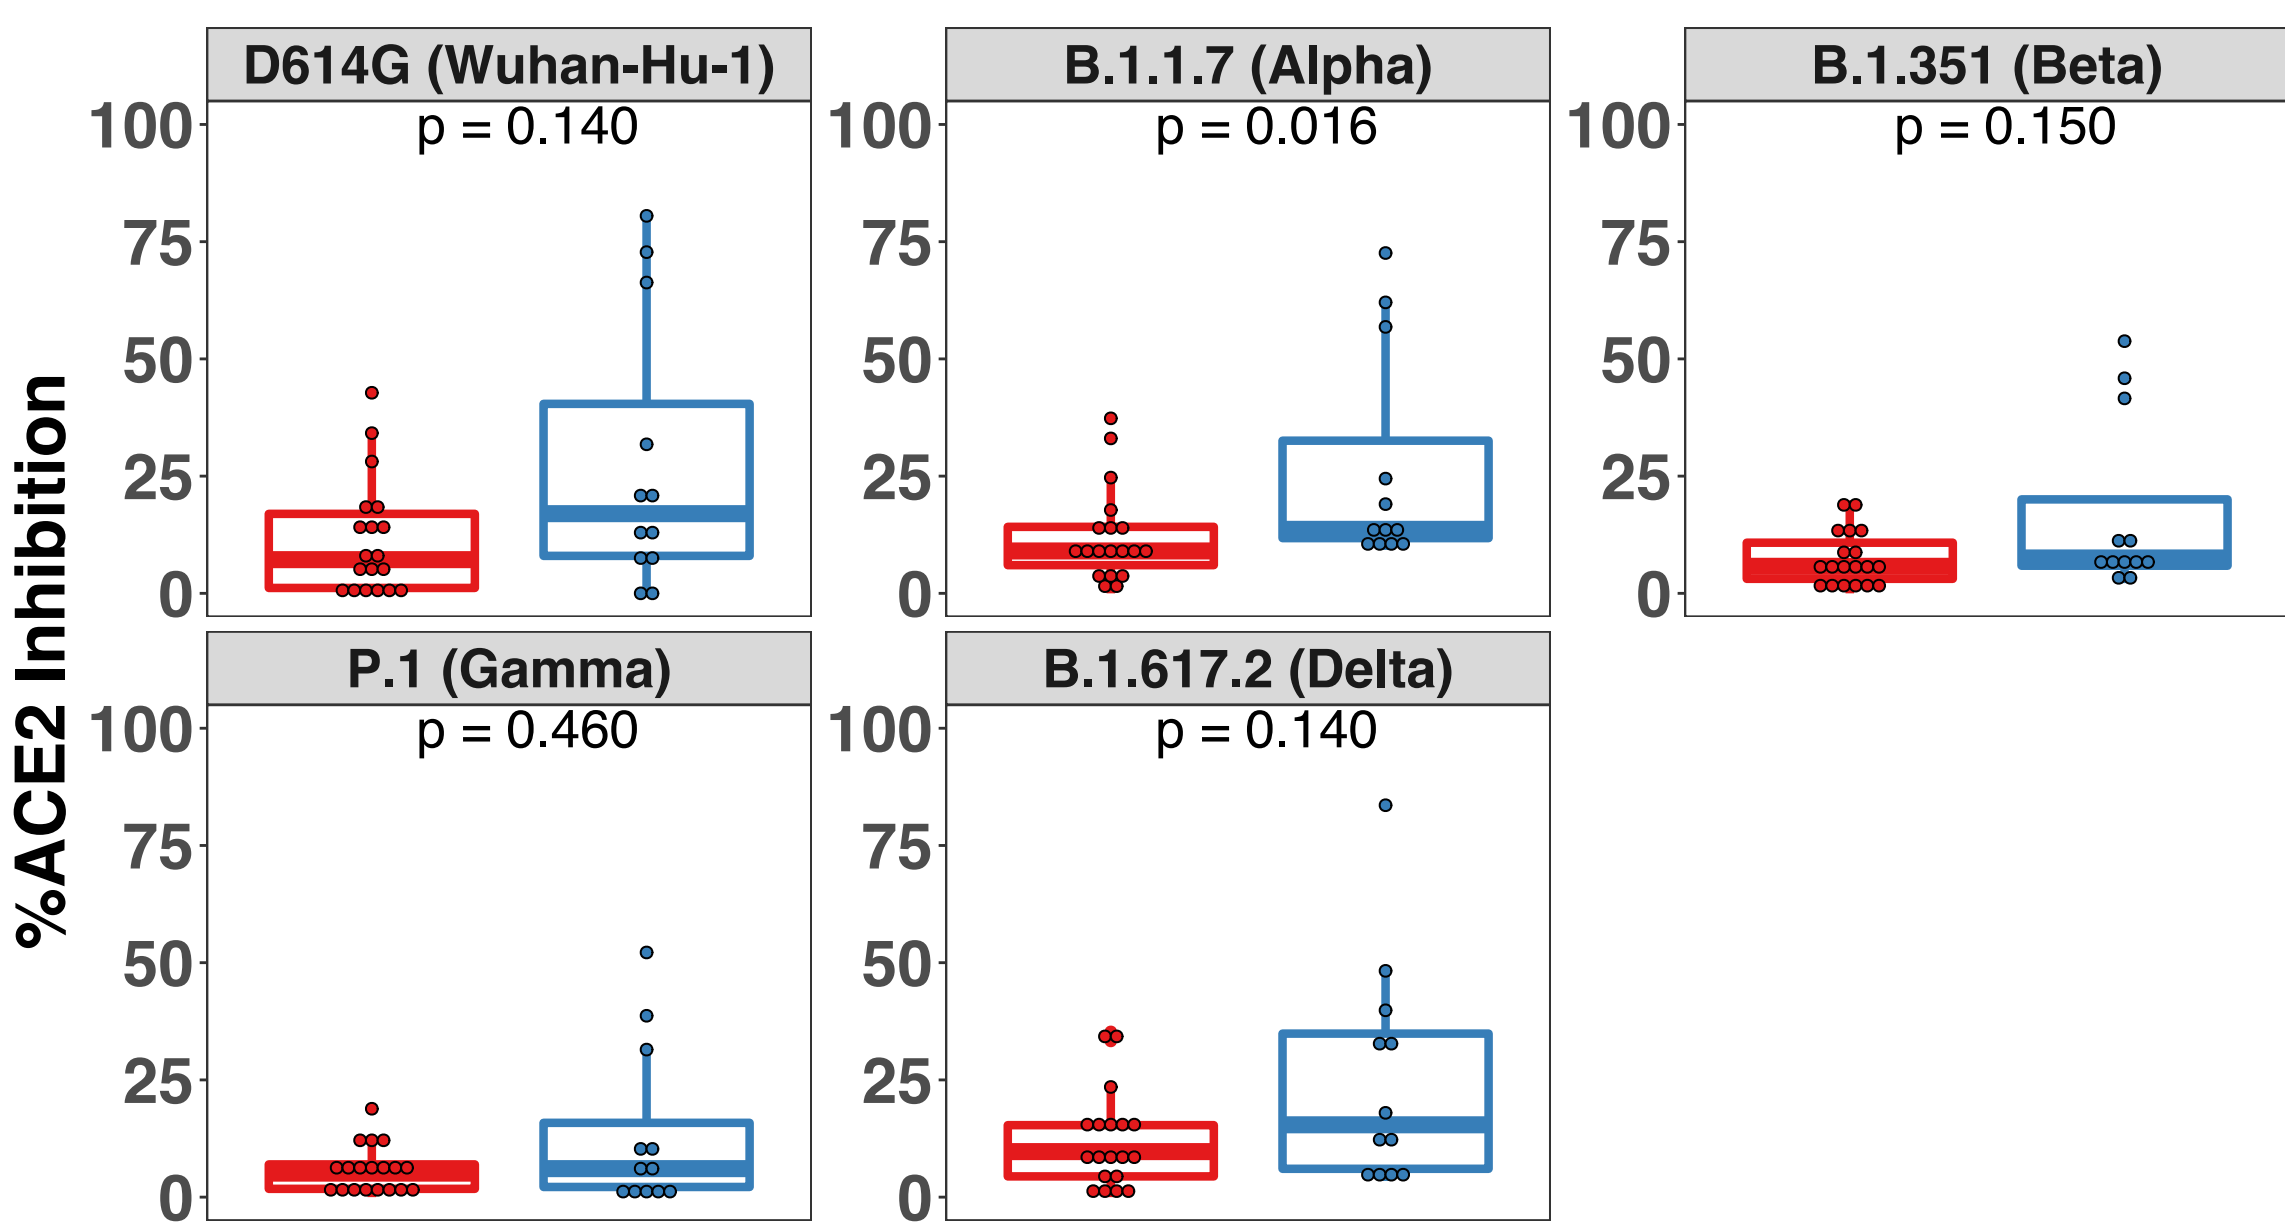

Supplement: Supplementary file [file media-2.pdf]
