# Supplementary material for: A Third Dose of SARS-CoV-2 Vaccine Increases Neutralizing Antibodies Against Variants of Concern in Solid Organ Transplant Recipients
Source: bioRxiv or medRxiv preprint supplement (doi:10.1101/2021.08.11.21261914), 2021-10-13

# SARS-CoV-2 Nucleocapsid

$p = 0.230$

$\log_{10}\text{IgG, AU/mL}$

4  
3  
2  
1  
0

Pre

Post

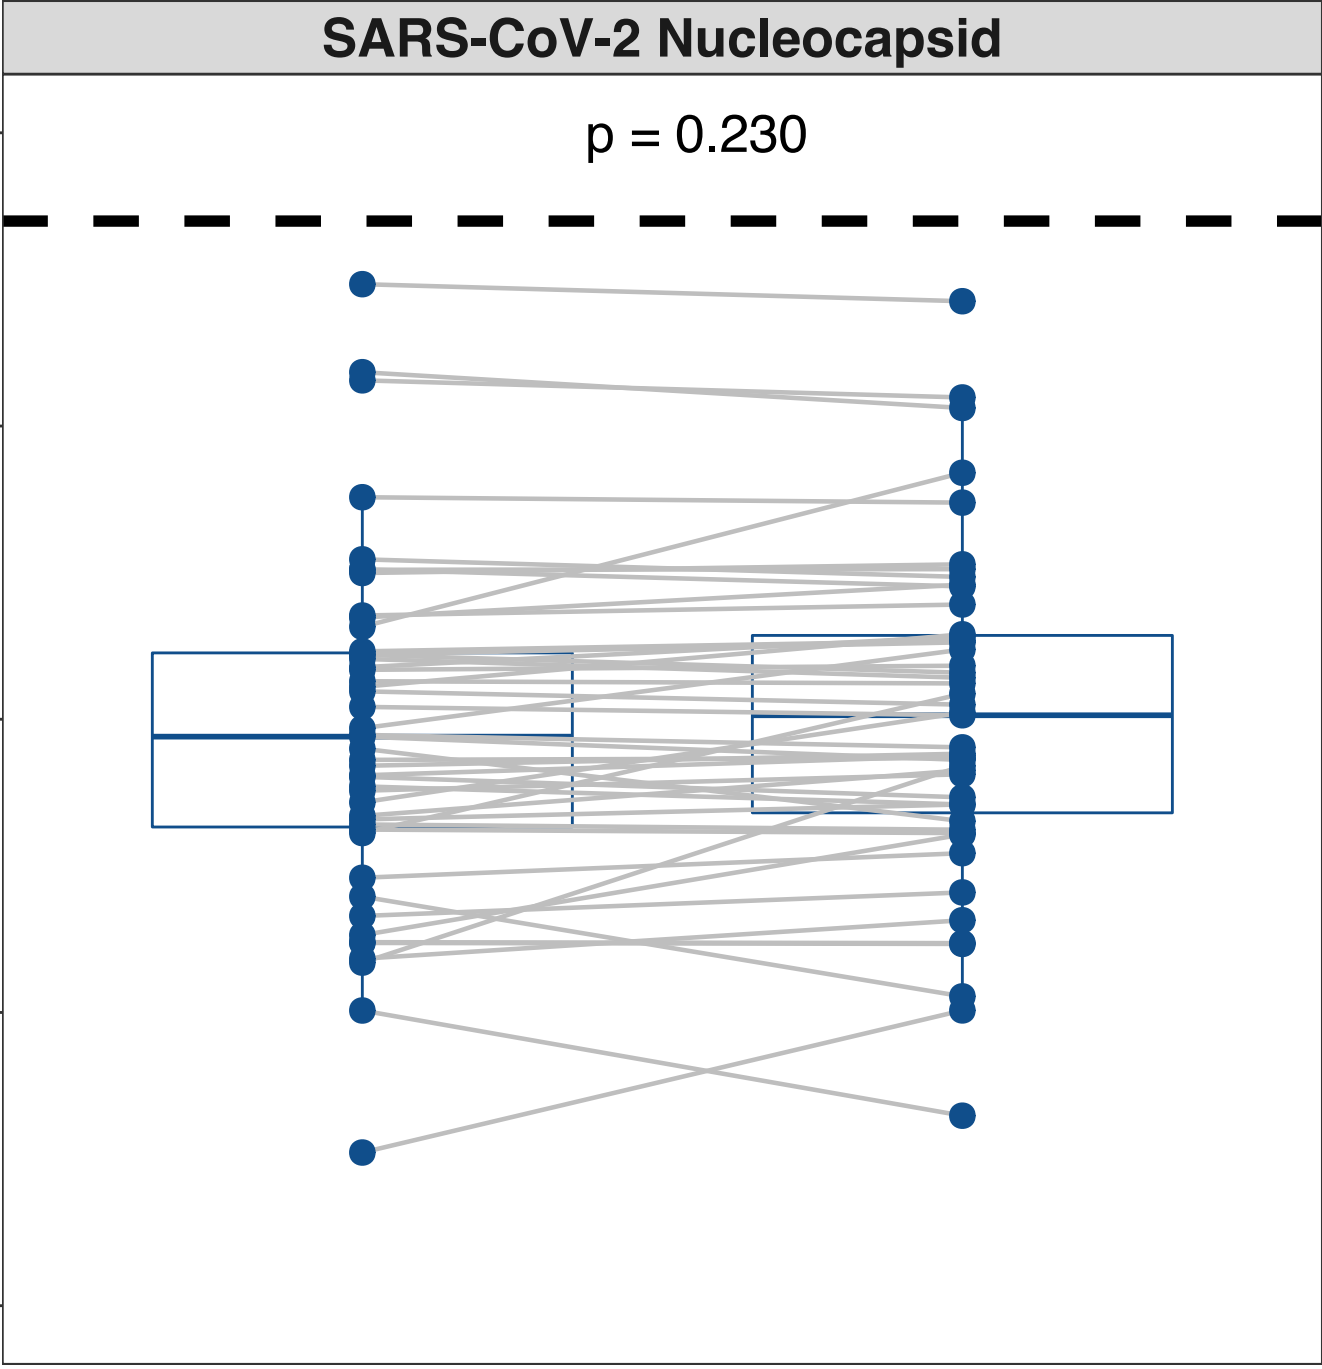

Supplement: Supplementary file [file media-2.pdf]
